# Supplementary material for: Chronic Cholecystitis of Dogs: Clinicopathologic Features and Relationship with Liver
Source: MDPI journal article supplement (doi:10.3390/ani11113324), 2021-11-21
Supplement: s1 [file s1]

Supplementary Table S1. Signalment and results of clinicopathological investigation of 219 dogs.

| Number | Age <sup>a</sup> | Breed                   | Sex             | Sludge | Mucocoele      | G2 <sup>b</sup> | G1 <sup>c</sup> | G0 <sup>d</sup> | GWTT <sup>e</sup> | Bacteria | Lymphoid follicle | Edema | Smooth muscle thickening | Liver inflammation | HLD <sup>f</sup> | PPVH <sup>g</sup> |
|--------|------------------|-------------------------|-----------------|--------|----------------|-----------------|-----------------|-----------------|-------------------|----------|-------------------|-------|--------------------------|--------------------|------------------|-------------------|
| 1      | 156              | sheltie                 | CM <sup>h</sup> |        | P <sup>i</sup> | P               |                 |                 | 6930              | P        | P                 |       | P                        |                    | 874              |                   |
| 2      | 168              | mini schnauzer          | M <sup>i</sup>  |        | P              |                 | P               |                 | 1660              |          |                   |       | P                        |                    | 809              |                   |
| 3      | 92               | toy poodle              | CM              |        |                |                 | P               |                 | 1550              |          |                   | P     |                          |                    | 823              |                   |
| 4      | 135              | pomeranian              | CM              | P      |                |                 |                 |                 | 297               |          |                   |       |                          | P                  | 368              | P                 |
| 5      | 133              | shih tzu                | CM              | P      |                |                 | P               |                 | 1170              |          |                   | P     |                          |                    | 782              | P                 |
| 6      | 72               | chihuahua               | CM              | P      | P              |                 | P               |                 | 1010              |          |                   |       |                          |                    | 1146             |                   |
| 7      | 68               | shiba                   | F <sup>k</sup>  | P      |                | P               |                 |                 | 1990              |          |                   | P     | P                        | P                  | 547              | P                 |
| 8      | 72               | mini dax                | CM              |        |                | P               |                 |                 | 1450              | P        | P                 | P     | P                        | P                  | 1056             |                   |
| 9      | 83               | beagle                  | SF <sup>l</sup> | P      |                |                 | P               |                 | 922               |          |                   | P     |                          |                    | 825              |                   |
| 10     | 145              | chihuahua               | SF              | P      |                | P               |                 |                 | 1360              | P        | P                 | P     | P                        |                    | 968              |                   |
| 11     | 115              | jack russell terrier    | SF              | P      |                |                 | P               |                 | 721               |          |                   | P     |                          |                    | 786              | P                 |
| 12     | 142              | toy poodle              | SF              | P      |                |                 | P               |                 | 1020              |          |                   | P     |                          |                    | 932              |                   |
| 13     | 145              | mini dax                | SF              | P      |                | P               |                 |                 | 894               |          | P                 |       | P                        |                    | 949              |                   |
| 14     | 118              | papillon                | SF              |        |                |                 | P               |                 | 1060              |          |                   | P     |                          |                    | 818              |                   |
| 15     | 110              | jack russell terrier    | SF              | P      |                |                 | P               |                 | 704               |          | P                 |       | P                        |                    | 896              |                   |
| 16     | 155              | shih tzu                | SF              | P      | P              |                 | P               |                 | 1740              |          |                   | P     | P                        | P                  | 851              |                   |
| 17     | 84               | chihuahua               | CM              | P      |                |                 | P               |                 | 725               |          |                   | P     |                          |                    | 825              |                   |
| 18     | 132              | sheltie                 | SF              |        |                | P               |                 |                 | 916               |          | P                 |       | P                        | P                  | 1052             |                   |
| 19     | 98               | toy poodle              | SF              |        |                | P               |                 |                 | 1670              | P        | P                 |       | P                        |                    | 1256             |                   |
| 20     | 149              | welsh corgi             | M               | P      |                |                 | P               |                 | 835               | P        |                   | P     |                          |                    | 1099             |                   |
| 21     | 149              | mini dax                | SF              |        |                | P               |                 |                 | 912               |          | P                 | P     | P                        |                    | 711              | P                 |
| 22     | 114              | mini schnauzer          | SF              | P      |                |                 | P               |                 | 1320              |          |                   | P     | P                        |                    | 1081             |                   |
| 23     | 179              | toy poodle              | CM              |        |                |                 | P               |                 | 556               |          |                   | P     |                          |                    | 797              | P                 |
| 24     | 172              | chihuahua               | SF              |        | P              | P               |                 |                 | 1510              | P        | P                 |       | P                        | P                  | 971              |                   |
| 25     | 147              | mini dax                | CM              |        | P              | P               |                 |                 | 2010              | P        |                   |       | P                        | P                  | 1450             |                   |
| 26     | 119              | toy poodle              | CM              | P      | P              |                 | P               |                 | 753               |          |                   | P     | P                        | P                  | 1085             |                   |
| 27     | 151              | mini dax                | SF              |        | P              |                 | P               |                 | 1190              |          |                   | P     | P                        |                    | 1201             |                   |
| 28     | 168              | american cocker spaniel | SF              |        | P              |                 |                 | P               | 8770              | P        |                   |       |                          | P                  | 1210             |                   |
| 29     | 111              | mini dax                | SF              |        |                | P               |                 |                 | 1160              |          |                   | P     | P                        | P                  | 751              | P                 |
| 30     | 116              | labrador                | F               |        |                |                 | P               |                 | 1780              |          |                   | P     | P                        | P                  | 986              |                   |
| 31     | 121              | pug                     | SF              |        |                |                 |                 |                 | 1750              |          |                   |       |                          | P                  | 1143             |                   |
| 32     | 140              | chihuahua               | CM              |        | P              |                 |                 | P               | 663               |          |                   |       |                          | P                  | 1133             |                   |
| 33     | 173              | papillon                | SF              |        | P              |                 | P               |                 | 1000              |          |                   | P     | P                        |                    | 724              | P                 |
| 34     | 122              | mini dax                | CM              | P      |                |                 | P               |                 | 860               |          | P                 | P     | P                        |                    | 912              |                   |
| 35     | 30               | french bull             | M               | P      |                | P               |                 |                 | 1780              |          | P                 | P     | P                        |                    | 989              |                   |
| 36     | 104              | toy poodle              | SF              |        |                |                 | P               |                 | 994               |          |                   | P     | P                        |                    | 861              |                   |
| 37     | 115              | mini schnauzer          | SF              | P      |                |                 | P               |                 | 445               |          | P                 |       |                          | P                  | 833              |                   |
| 38     | 127              | shiba                   | SF              | P      |                |                 | P               |                 | 917               |          |                   | P     | P                        |                    | 765              | P                 |
| 39     | 180              | mini dax                | SF              |        | P              |                 | P               |                 | 831               |          | P                 |       | P                        |                    | 1052             |                   |
| 40     | 86               | mix                     | SF              |        |                | P               |                 |                 | 1140              | P        | P                 |       | P                        |                    | 892              |                   |
| 41     | 148              | toy poodle              | CM              |        | P              |                 |                 | P               | 643               |          |                   |       |                          |                    | 996              |                   |
| 42     | 149              | mini dax                | SF              | P      | P              |                 | P               |                 | 586               |          |                   |       |                          |                    | 675              | P                 |
| 43     | 172              | toy poodle              | CM              | P      |                |                 | P               |                 | 434               |          |                   |       |                          |                    | 519              | P                 |
| 44     | 181              | mix                     | CM              |        | P              |                 |                 | P               | 2040              |          |                   |       |                          |                    | 890              |                   |
| 45     | 95               | toy poodle              | CM              | P      |                |                 | P               |                 | 370               |          | P                 |       |                          |                    | 1075             |                   |
| 46     | 189              | mini dax                | CM              |        | P              |                 | P               |                 | 5190              |          |                   |       |                          |                    | 874              |                   |
| 47     | 103              | toy poodle              | M               |        | P              |                 |                 | P               | 1760              |          |                   |       |                          |                    | 815              | P                 |
| 48     | 36               | toy poodle              | F               | P      |                |                 | P               |                 | 613               |          |                   | P     |                          |                    | 964              |                   |
| 49     | 96               | papillon                | SF              |        | P              |                 | P               |                 | 578               |          | P                 |       | P                        | P                  | 709              | P                 |
| 50     | 50               | mini schnauzer          | F               | P      |                |                 | P               |                 | 307               |          | P                 | P     |                          |                    | 771              | P                 |
| 51     | 132              | mini dax                | SF              | P      |                | P               |                 |                 | 667               |          | P                 |       | P                        | P                  | 780              | P                 |
| 52     | 140              | mini dax                | M               |        |                | P               |                 |                 | 1450              | P        | P                 | P     | P                        | P                  | 898              |                   |
| 53     | 78               | toy poodle              | SF              |        | P              |                 | P               |                 | 553               |          |                   |       | P                        | P                  | 923              |                   |
| 54     | 155              | sheltie                 | SF              |        | P              |                 | P               |                 | 717               |          | P                 |       | P                        |                    | 969              |                   |
| 55     | 146              | french bull             | SF              | P      |                |                 | P               |                 | 536               |          |                   | P     | P                        |                    | 861              |                   |
| 56     | 124              | yorkshire terrier       | SF              |        |                |                 | P               |                 | 840               |          |                   | P     | P                        |                    | 750              | P                 |
| 57     | 150              | mini dax                | SF              |        |                |                 | P               |                 | 203               |          |                   | P     |                          |                    | 904              |                   |
| 58     | 131              | toy poodle              | M               |        |                |                 | P               |                 | 633               | P        |                   |       | P                        | P                  | 626              | P                 |
| 59     | 21               | toy poodle              | M               | P      |                |                 | P               |                 | 850               |          | P                 | P     | P                        |                    | 807              |                   |
| 60     | 143              | toy poodle              | CM              | P      |                |                 | P               |                 | 604               |          |                   | P     |                          |                    | 744              | P                 |
| 61     | 120              | yorkshire terrier       | SF              | P      |                | P               |                 |                 | 834               | P        | P                 | P     | P                        | P                  | 677              | P                 |
| 62     | 75               | chihuahua               | CM              |        |                |                 |                 |                 | 762               |          |                   |       |                          | P                  | 753              | P                 |
| 63     | 146              | papillon                | CM              | P      |                | P               |                 |                 | 809               | P        | P                 | P     | P                        | P                  | 680              | P                 |
| 64     | 152              | mini dax                | SF              | P      | P              |                 | P               |                 | 796               |          | P                 |       |                          |                    | 883              |                   |
| 65     | 144              | mini dax                | SF              |        |                |                 | P               |                 | 825               |          |                   | P     | P                        | P                  | 716              | P                 |
| 66     | 119              | yorkshire terrier       | CM              | P      |                | P               |                 |                 | 1020              |          | P                 | P     | P                        |                    | 809              |                   |
| 67     | 100              | mini schnauzer          | CM              |        |                |                 | P               |                 | 848               |          |                   | P     | P                        | P                  | 847              |                   |
| 68     | 110              | toy poodle              | CM              | P      |                |                 | P               |                 | 401               |          |                   | P     | P                        |                    | 745              | P                 |
| 69     | 161              | chihuahua               | CM              |        |                | P               |                 |                 | 1540              |          | P                 |       | P                        | P                  | 896              |                   |
| 70     | 112              | toy poodle              | CM              |        |                |                 | P               |                 | 966               |          |                   | P     | P                        |                    | 783              | P                 |
| 71     | 192              | shiba                   | F               | P      | P              |                 | P               |                 | 1320              | P        |                   | P     |                          | P                  | 797              |                   |
| 72     | 113              | mini dax                | CM              |        |                |                 | P               |                 | 493               |          |                   | P     |                          |                    | 1403             |                   |
| 73     | 162              | sheltie                 | CM              |        |                | P               |                 |                 | 1450              |          |                   | P     |                          | P                  | 698              | P                 |
| 74     | 96               | chihuahua               | CM              | P      |                |                 | P               |                 | 644               | P        |                   | P     | P                        |                    | 898              |                   |
| 75     | 132              | pomeranian              | CM              | P      |                |                 | P               |                 | 481               | P        |                   |       |                          |                    | 838              |                   |
| 76     | 117              | toy poodle              | SF              |        |                |                 | P               |                 | 392               |          |                   | P     | P                        |                    | 959              |                   |
| 77     | 131              | toy poodle              | CM              | P      | P              |                 | P               |                 | 524               | P        |                   |       | P                        |                    | 1116             |                   |
| 78     | 170              | mini dax                | CM              |        |                | P               |                 |                 | 3800              |          |                   |       | P                        | P                  | 825              |                   |
| 79     | 172              | mini dax                | CM              |        |                | P               |                 |                 | 1340              | P        | P                 | P     | P                        |                    | 913              |                   |
| 80     | 127              | chihuahua               | CM              |        |                |                 | P               |                 | 848               |          | P                 | P     | P                        |                    | 712              |                   |
| 81     | 86               | mix                     | SF              |        |                | P               |                 |                 | 1650              |          | P                 | P     | P                        | P                  | 944              |                   |
| 82     | 175              | toy poodle              | CM              | P      |                | P               |                 |                 | 2070              |          | P                 | P     | P                        | P                  | 1103             |                   |
| 83     | 108              | toy poodle              | CM              | P      | P              |                 | P               |                 | 460               |          |                   | P     | P                        |                    | 793              |                   |
| 84     | 99               | chihuahua               | SF              |        |                |                 | P               |                 | 558               |          |                   | P     | P                        |                    | 1146             |                   |
| 85     | 129              | pug                     | SF              |        |                |                 | P               |                 | 1050              |          |                   | P     | P                        |                    | 763              | P                 |
| 86     | 119              | papillon                | SF              | P      |                |                 | P               |                 | 960               |          |                   | P     | P                        |                    | 678              | P                 |
| 87     | 154              | chihuahua               | SF              | P      |                |                 |                 |                 | 664               |          |                   |       |                          | P                  | 895              |                   |
| 88     | 120              | mini dax                | CM              | P      |                | P               |                 |                 | 2270              | P        | P                 |       | P                        | P                  | 701              | P                 |
| 89     | 163              | american cocker spaniel | SF              |        | P              |                 | P               |                 | 1670              |          |                   | P     | P                        | P                  | 826              |                   |
| 90     | 158              | Chihuahua               | CM              |        |                | P               |                 |                 | 2610              | P        | P                 |       | P                        | P                  | NA               |                   |
| 91     | 156              | mini dax                | SF              |        |                |                 | P               |                 | 949               | P        |                   | P     | P                        |                    | 608              | P                 |
| 92     | 87               | french bull             | CM              | P      |                |                 |                 | P               | 523               |          |                   | P     | P                        |                    | 785              | P                 |
| 93     | 142              | papillon                | M               | P      |                |                 | P               |                 | 856               |          |                   | P     | P                        |                    | 944              |                   |
| 94     | 108              | mini schnauzer          | CM              |        | P              |                 |                 |                 | 381               |          |                   |       |                          | P                  | 1038             |                   |
| 95     | 140              | french bull             | SF              | P      |                |                 | P               |                 | 627               |          |                   | P     |                          |                    | 715              | P                 |
| 96     | 109              | toy poodle              | CM              | P      |                |                 | P               |                 | 568               | P        |                   | P     | P                        |                    | 950              |                   |
| 97     | 152              | mini dax                | CM              |        |                |                 | P               |                 | 1050              |          |                   | P     | P                        |                    | 1103             |                   |
| 98     | 149              | mini dax                | SF              | P      |                |                 | P               |                 | 787               |          |                   |       | P                        |                    | 1163             |                   |

|     |     |                         |    |   |   |   |   |   |      |   |   |   |   |   |   |      |   |
|-----|-----|-------------------------|----|---|---|---|---|---|------|---|---|---|---|---|---|------|---|
| 99  | 157 | mini dax                | SF | P |   | P |   |   | 1430 | P |   |   | P |   | P | 1061 |   |
| 100 | 157 | shiba                   | M  | P |   |   | P |   | 560  |   |   | P |   |   |   | 992  |   |
| 101 | 141 | mini schnauzer          | SF | P | P |   | P |   | 462  |   |   |   |   |   |   | 1031 |   |
| 102 | 170 | shih tzu                | SF |   |   | P |   |   | 1420 | P | P | P | P |   | P | 814  |   |
| 103 | 127 | shiba                   | SF | P |   |   | P |   | 562  |   |   | P | P |   |   | 1073 |   |
| 104 | 131 | shiba                   | CM |   | P |   | P |   | 1170 |   |   |   |   |   | P | 953  |   |
| 105 | 156 | chihuahua               | SF |   | P |   | P |   | 1190 |   |   | P | P |   | P | 937  |   |
| 106 | 152 | american cocker spaniel | CM | P |   | P |   |   | 1230 |   |   | P | P |   |   | 860  |   |
| 107 | 203 | chihuahua               | M  |   |   | P |   |   | 1480 | P | P |   | P |   | P | 729  |   |
| 108 | 156 | pomeranian              | SF | P |   | P |   |   | 1750 | P | P |   | P |   | P | 732  | P |
| 109 | 55  | toy poodle              | SF | P |   |   |   | P | 322  |   |   | P |   |   |   | 925  |   |
| 110 | 138 | pomeranian              | CM | P |   | P |   |   | 1650 | P | P |   |   | P | P | 602  | P |
| 111 | 178 | maltese                 | SF |   |   | P |   |   | 810  | P | P |   | P |   | P | 519  | P |
| 112 | 119 | mini dax                | SF | P |   |   |   | P | 407  |   |   | P | P |   |   | 723  | P |
| 113 | 103 | pomeranian              | CM | P |   |   | P |   | 760  | P |   |   | P |   |   | 666  | P |
| 114 | 187 | maltese                 | SF | P |   |   | P |   | 498  |   |   |   | P |   |   | 656  | P |
| 115 | 112 | maltese                 | SF |   |   |   | P |   | 1190 |   |   |   | P |   | P | 683  | P |
| 116 | 98  | chihuahua               | SF |   |   |   | P |   | 736  |   |   |   | P |   |   | 663  | P |
| 117 | 96  | toy poodle              | SF | P |   |   | P |   | 935  |   | P | P |   |   |   | 734  | P |
| 118 | 136 | shiba                   | M  |   | P |   |   |   | 1470 | P |   | P |   |   | P | 785  | P |
| 119 | 138 | toy poodle              | SF | P |   |   | P |   | 1510 | P | P | P | P |   |   | 866  |   |
| 120 | 120 | chihuahua               | CM | P |   |   | P |   | 405  |   |   |   | P |   |   | 770  |   |
| 121 | 173 | shih tzu                | CM |   |   |   | P |   | 981  | P |   | P |   |   |   | 691  | P |
| 122 | 96  | shiba                   | SF | P |   |   | P |   | 655  |   |   |   | P |   |   | 724  | P |
| 123 | 95  | yorkshire terrier       | SF |   | P |   | P |   | 489  |   |   |   | P |   |   | 767  |   |
| 124 | 132 | G shepherd              | M  |   |   | P |   |   | 2130 | P | P |   | P |   |   | 682  | P |
| 125 | 69  | mix                     | CM |   |   |   |   |   | 1640 | P |   |   |   |   |   | 993  |   |
| 126 | 102 | yorkshire terrier       | F  |   |   |   | P |   | 1300 | P |   |   |   |   | P | 876  |   |
| 127 | 120 | mix                     | CM |   |   |   | P |   | 840  |   |   | P | P |   |   | 1026 |   |
| 128 | 166 | shiba                   | CM | P |   | P |   |   | 1360 | P |   |   | P |   |   | 733  | P |
| 129 | 134 | pug                     | SF | P |   |   | P |   | 897  |   |   |   | P |   |   | 867  |   |
| 130 | 119 | yorkshire terrier       | SF |   | P | P |   |   | 937  | P | P | P | P |   |   | 800  |   |
| 131 | 119 | pomeranian              | SF |   | P |   |   |   | 1040 |   |   |   | P |   |   | 715  |   |
| 132 | 127 | mix                     | CM | P |   |   | P |   | 627  |   |   |   | P |   |   | 823  |   |
| 133 | 66  | mini dax                | CM |   |   | P |   |   | 1020 | P | P | P | P |   |   | 760  | P |
| 134 | 165 | chihuahua               | SF | P |   |   |   |   | 926  |   |   |   | P |   |   | 735  | P |
| 135 | 164 | mix                     | SF |   |   | P |   |   | 1440 | P | P | P | P |   | P | 717  | P |
| 136 | 144 | shiba                   | SF |   |   | P |   |   | 2280 |   |   | P | P |   |   | 621  | P |
| 137 | 109 | WHWT                    | CM |   |   |   | P |   | 1220 |   |   | P | P |   | P | NA   |   |
| 138 | 121 | chihuahua               | CM |   |   |   | P |   | 894  |   |   | P | P |   |   | 896  |   |
| 139 | 128 | mini dax                | M  | P |   | P |   |   | 1880 | P | P | P | P |   | P | 632  | P |
| 140 | 100 | pomeranian              | CM |   |   |   |   |   | 1560 |   |   |   |   |   |   | 832  |   |
| 141 | 107 | mini dax                | F  | P |   |   | P |   | 1120 | P | P | P | P |   |   | 687  | P |
| 142 | 55  | mix                     | SF |   |   |   | P |   | 271  |   |   | P |   |   |   | 924  |   |
| 143 | 62  | toy poodle              | CM |   |   |   | P |   | 484  |   |   | P |   |   |   | 1034 |   |
| 144 | 154 | mini dax                | SF | P |   |   | P |   | 715  |   | P | P | P |   |   | 881  |   |
| 145 | 74  | chihuahua               | SF | P |   |   | P |   | 334  |   |   | P |   |   |   | 883  |   |
| 146 | 171 | mini dax                | SF |   |   | P |   |   | 699  | P | P | P |   |   | P | 706  | P |
| 147 | 171 | mini dax                | M  |   |   |   | P |   | 407  | P |   |   | P |   |   | 987  |   |
| 148 | 150 | toy poodle              | SF |   |   |   | P | P | 1100 |   |   |   | P |   | P | 892  |   |
| 149 | 74  | toy poodle              | CM | P |   |   | P |   | 357  | P |   | P | P |   |   | 782  | P |
| 150 | 42  | toy poodle              | SF | P |   |   |   | P | 189  | P |   |   |   |   |   | 789  | P |
| 151 | 145 | toy poodle              | SF | P |   |   | P |   | 814  |   |   |   |   |   |   | 898  |   |
| 152 | 147 | toy poodle              | SF |   |   |   | P |   | 461  |   |   | P | P |   |   | 582  | P |
| 153 | 85  | jack russell terrier    | SF | P |   |   | P |   | 701  |   |   |   | P |   |   | 652  | P |
| 154 | 109 | pomeranian              | CM |   |   | P |   |   | 795  | P | P |   | P |   |   | 837  |   |
| 155 | 150 | maltese                 | SF | P | P |   |   | P | 524  |   |   |   |   |   | P | 1101 |   |
| 156 | 168 | mini dax                | SF |   |   | P |   |   | 1440 | P | P | P | P |   | P | 610  | P |
| 157 | 148 | papillon                | SF | P |   |   | P |   | 1100 |   |   | P | P |   |   | 909  |   |
| 158 | 49  | french bull             | SF |   |   | P |   |   | 1750 | P | P | P | P |   | P | 882  |   |
| 159 | 168 | mini dax                | CM | P |   |   | P |   | 643  |   |   | P |   |   |   | 728  | P |
| 160 | 123 | chihuahua               | SF | P | P |   | P |   | 1550 |   |   | P |   |   |   | 501  | P |
| 161 | 136 | mini schnauzer          | SF | P |   |   | P |   | 1080 | P | P |   | P |   | P | 912  |   |
| 162 | 146 | mix                     | SF | P |   |   | P |   | 534  |   |   | P |   |   |   | 740  | P |
| 163 | 168 | sheltie                 | SF |   |   |   | P |   | 544  |   |   | P |   |   | P | 593  | P |
| 164 | 193 | papillon                | CM |   |   | P |   |   | 939  | P | P | P | P |   | P | 568  | P |
| 165 | 102 | G ret                   | SF | P | P |   | P |   | 1160 |   |   | P |   |   | P | 767  | P |
| 166 | 48  | toy poodle              | CM |   |   |   | P |   | 744  | P |   |   | P |   |   | 984  |   |
| 167 | 137 | sheltie                 | CM | P | P |   | P |   | 735  |   |   |   | P |   |   | 1115 |   |
| 168 | 112 | mini dax                | SF |   |   | P |   |   | 1180 |   | P | P | P |   | P | 748  | P |
| 169 | 107 | yorkshire terrier       | SF |   |   |   | P |   | 881  | P | P |   | P |   |   | 622  | P |
| 170 | 142 | mini dax                | SF |   | P | P |   |   | 996  |   | P |   | P |   | P | 737  | P |
| 171 | 132 | mini dax                | SF |   |   |   | P |   | 666  |   |   | P |   |   |   | 714  | P |
| 172 | 91  | dax                     | CM | P |   | P |   |   | 1490 |   |   | P | P |   |   | 1118 |   |
| 173 | 91  | welsh corgi             | SF | P |   |   | P |   | 1720 |   |   | P | P |   |   | 784  | P |
| 174 | 183 | pug                     | SF |   | P |   | P |   | 1090 |   |   |   | P |   | P | 994  |   |
| 175 | 149 | mini dax                | CM |   |   | P |   |   | 1610 | P | P |   | P |   | P | 854  |   |
| 176 | 70  | toy poodle              | CM |   |   |   | P |   | 318  | P |   | P |   |   | P | 655  | P |
| 177 | 152 | mini schnauzer          | CM | P |   |   | P |   | 758  |   |   | P | P |   |   | 670  | P |
| 178 | 146 | mini dax                | SF |   |   |   | P |   | 972  |   |   | P | P |   | P | 878  |   |
| 179 | 150 | chihuahua               | CM | P | P |   | P |   | 1700 |   |   | P |   |   |   | 833  |   |
| 180 | 161 | beagle                  | CM | P |   |   |   | P | 407  |   |   | P |   |   |   | 701  | P |
| 181 | 162 | chihuahua               | SF | P | P | P |   |   | 1680 | P | P |   | P |   |   | 859  |   |
| 182 | 127 | welsh corgi             | SF |   | P | P |   |   | 1700 | P | P |   | P |   | P | 678  | P |
| 183 | 104 | chihuahua               | SF |   |   | P |   |   | 1260 | P |   | P | P |   | P | 574  | P |
| 184 | 24  | norfolk ter             | SF |   |   |   |   | P | 1260 |   |   | P | P |   |   | 645  | P |
| 185 | 192 | mini dax                | SF | P |   |   | P |   | 629  | P |   |   |   |   |   | 576  | P |
| 186 | 164 | mix                     | SF |   | P |   | P |   | 583  |   |   |   |   |   |   | 819  |   |
| 187 | 122 | mix                     | SF | P |   |   | P |   | 762  |   |   | P |   |   |   | 749  | P |
| 188 | 168 | toy poodle              | F  |   | P |   |   | P | 846  |   |   |   |   |   | P | 875  |   |
| 189 | 175 | chihuahua               | SF | P |   |   | P |   | 425  |   |   |   |   |   |   | 796  |   |
| 190 | 61  | toy poodle              | CM |   |   |   | P |   | 492  |   |   |   |   |   |   | 857  |   |
| 191 | 88  | yorkshire terrier       | CM | P | P |   | P |   | 494  |   |   | P |   |   |   | 845  |   |
| 192 | 161 | toy poodle              | SF | P |   |   | P |   | 206  |   |   | P |   |   | P | 878  |   |
| 193 | 123 | american cocker spaniel | SF | P |   |   | P |   | 683  |   |   |   | P |   |   | 674  | P |
| 194 | 107 | mix                     | CM |   |   | P |   |   | 2090 | P | P |   | P |   | P | 785  | P |
| 195 | 145 | mini schnauzer          | SF | P |   |   | P |   | 267  |   | P |   |   |   |   | 558  | P |
| 196 | 86  | toy poodle              | SF | P |   |   | P |   | 702  |   |   | P | P |   |   | 882  |   |
| 197 | 102 | french bull             | SF |   |   |   | P |   | 708  |   |   | P |   |   |   | 734  | P |
| 198 | 156 | papillon                | SF | P |   |   | P |   | 887  |   |   |   | P |   |   | 873  |   |
| 199 | 146 | maltese                 | SF | P |   | P |   |   | 1360 |   | P | P | P |   | P | 846  |   |

|     |     |                |    |   |   |   |   |   |      |   |   |   |   |   |      |   |
|-----|-----|----------------|----|---|---|---|---|---|------|---|---|---|---|---|------|---|
| 200 | 108 | toy poodle     | SF |   |   |   |   |   | 570  |   |   |   |   |   | NA   |   |
| 201 | 148 | mix            | M  |   | P | P |   |   | 1750 |   | P | P | P |   | NA   |   |
| 202 | 72  | shiba          | F  |   | P |   |   | P | 909  |   |   |   |   |   | 706  | P |
| 203 | 174 | mini dax       | CM |   |   | P |   |   | 1560 | P | P | P | P | P | 879  |   |
| 204 | 189 | mini dax       | SF | P |   | P |   |   | 789  | P | P |   | P |   | 622  | P |
| 205 | 132 | shih tzu       | SF |   | P |   |   | P | 2450 |   |   |   |   | P | 614  | P |
| 206 | 145 | mini dax       | M  |   |   |   | P |   | 557  |   |   |   |   |   | 836  |   |
| 207 | 60  | chihuahua      | M  |   |   |   |   |   | 755  |   |   |   |   | P | 947  |   |
| 208 | 132 | shih tzu       | CM |   |   |   | P |   | 539  |   |   |   |   |   | 748  | P |
| 209 | 101 | toy poodle     | SF |   | P |   | P |   | 1100 |   | P |   |   |   | 892  |   |
| 210 | 175 | chihuahua      | CM |   |   |   |   | P | 105  |   |   |   |   |   | 742  | P |
| 211 | 36  | mix            | SF | P |   |   |   | P | 212  |   |   |   |   |   | 828  |   |
| 212 | 126 | pomeranian     | M  |   | P |   | P |   | 2710 |   | P |   | P |   | 932  |   |
| 213 | 152 | mini dax       | SF | P |   | P |   |   | 782  | P |   |   | P |   | 1025 |   |
| 214 | 111 | mini dax       | SF |   |   |   | P |   | 859  |   | P | P | P |   | 867  |   |
| 215 | 144 | chihuahua      | CM | P |   |   | P |   | 533  |   |   |   |   |   | 880  |   |
| 216 | 137 | toy poodle     | CM | P |   |   | P |   | 788  |   |   |   | P |   | NA   |   |
| 217 | 120 | mix            | CM | P |   |   | P |   | 639  |   |   |   | P |   | 714  | P |
| 218 | 144 | mini schnauzer | CM |   | P |   | P |   | 481  |   |   |   | P |   | 989  |   |
| 219 | 132 | toy poodle     | SF | P |   |   | P |   | 269  |   |   |   |   |   | 805  |   |

<sup>a</sup>Months, <sup>b</sup>severe gallbladder mucosal inflammation, <sup>c</sup>mild gallbladder mucosal inflammation, <sup>d</sup>no gallbladder mucosal inflammation, <sup>e</sup>gallbladder wall total thickness, <sup>f</sup>hepatic lobular diameter, <sup>g</sup>primary portal vein hypoplasia, <sup>h</sup>castrated male, <sup>i</sup>present, <sup>j</sup>male, <sup>k</sup>female, <sup>l</sup>spayed female.
